# Supplementary material for: Enhanced pseudocapacitive energy storage and thermal stability of Sn2+ ion-intercalated molybdenum titanium carbide (Mo2TiC2) MXene
Source: Royal Society of Chemistry journal article supplement (doi:10.1039/d2ra05552j), 2022-01-01
Supplement: d2ra05552j1.pdf [file d2ra05552j1.pdf]

# Enhanced pseudocapacitive energy storage and thermal stability of Sn<sup>+2</sup> ion-intercalated molybdenum titanium carbide (Mo<sub>2</sub>TiC<sub>2</sub>) MXene

Irfan Ali, Zulqarnain Haider, Syed Rizwan\*

<sup>a</sup>Physics Characterization and Simulations Lab (PCSL), Department of Physics, School of Natural Sciences (SNS), National University of Sciences and Technology (NUST), Islamabad 44000, Pakistan.

## Supplementary Information

### SEM Data:

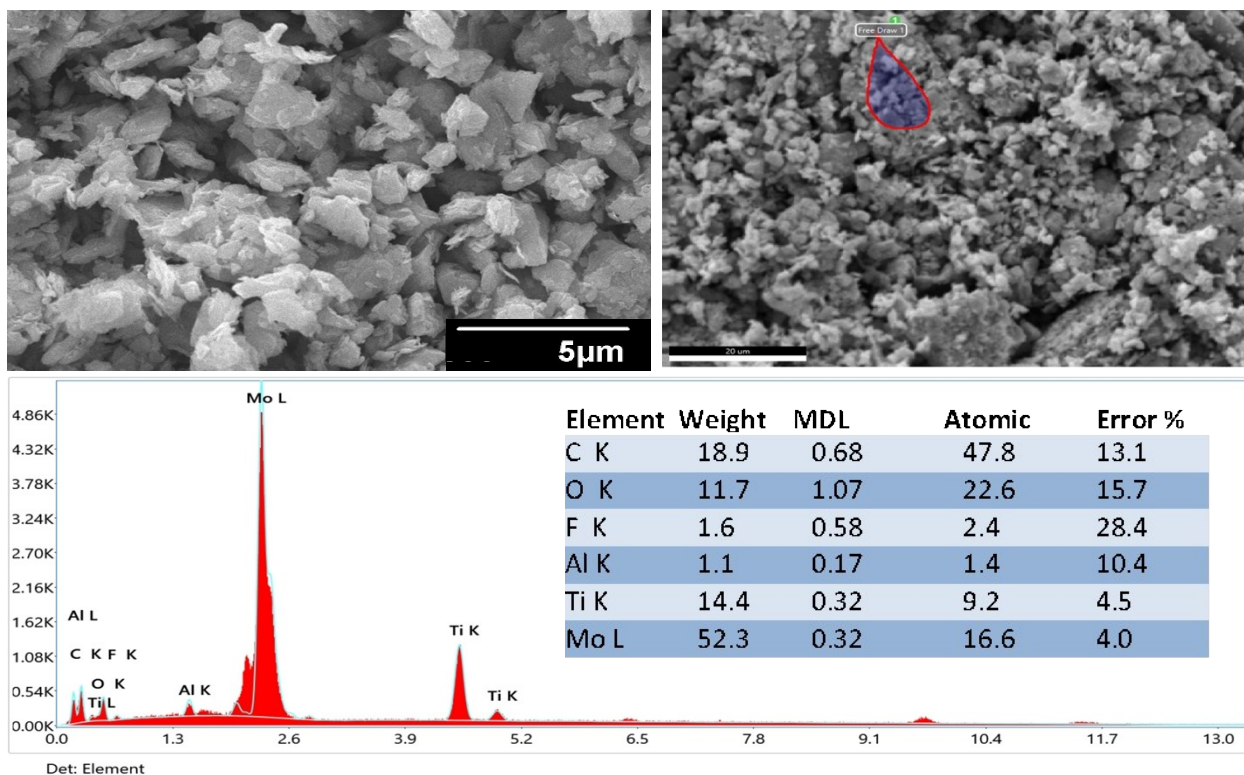

**Figure 1:** Mo<sub>2</sub>TiC<sub>2</sub> MXene SEM image along with their EDX data.

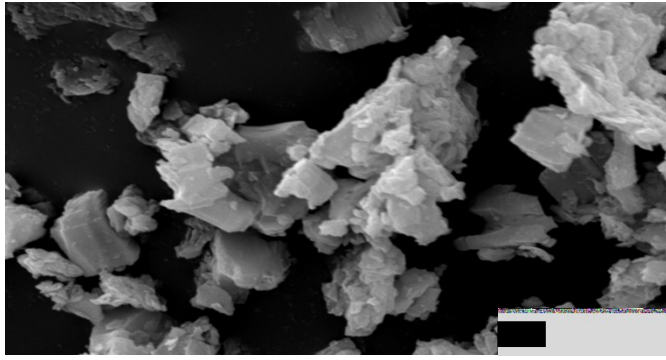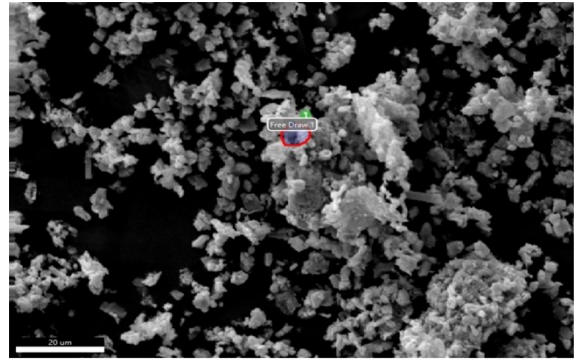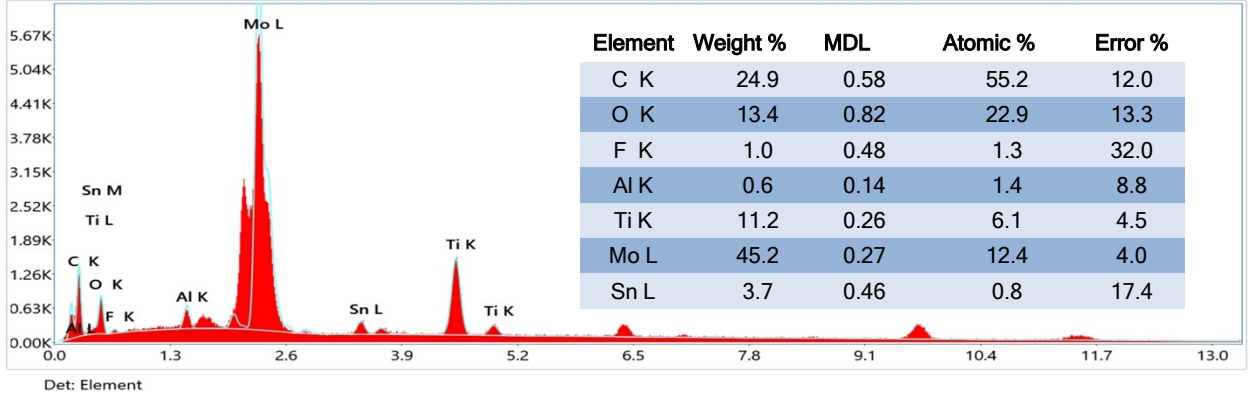

**Figure 2:** Sn@Mo<sub>2</sub>TiC<sub>2</sub> MXene SEM image along with their EDX data.

The dependence of peak value current on scan rate was explained by using the following eq. S11

$$I_p = a.v^b \quad (\text{S11})$$

Here a, b are constants,  $I_p$  represents the peak current and v used for scan rate, Generally the value of b=1 (capacitive process) b=0.5 (diffusion control dominated process) but most of the time in case of hybrid energy storage systems the value of b parameter lies between 1 and 0.5, which is evident of combine charge storage mechanism.

The formula used to measure the value of capacitance is written in eq. S12 [1,2]

$$C = \frac{\int I(V)dV}{mv\Delta V} \quad (\text{S12})$$

Here C stands for specific capacitance ( $F g^{-1}$ ),  $I(V)dV$  represents the integrated area of CV curve, m used to measure the mass of the active material (g), v stands the scan rate ( $mV s^{-1}$ ) and  $\Delta V$  represents the voltage window (V).

The eq. S11 can be interpreted in this way by taking log on both sides.

$$\text{Log}(I_p) = \text{Log}(a) + b \log(v) \quad (\text{S13})$$

To study the combine charge storage mechanism further due capacitive process and diffusion control, we used the eq. S14. Here the total peak current  $I_p$  is divided into  $k_1v$  (capacitive process) and  $k_2v^{0.5}$  (diffusion control process) and represents the contribution of charge storage mechanism in both the ways.

$$I_p = k_1v + k_2v^{0.5} \quad (\text{S14})$$

After dividing with  $v^{0.5}$  on both sides of eq. S14, hence the obtained eq. S15 basically provides the mathematical base to calculate the values of  $k_1$  &  $k_2$ , which was further utilized to calculate the percentage contributions of diffusion control and capacitive process mechanism.

$$\frac{I_p}{v^{0.5}} = k_1 v^{0.5} + k_2 \quad (\text{SI5})$$

Furthermore, the values of  $k_1$  and  $k_2$  can be determined by plotting a graph between  $I/v^{0.5}$  and  $v^{0.5}$  [3]. The slop represents the  $k_1$  value and the point of intercept defines the value of  $k_2$ .

**Table 1: Comparison of the current study with earlier published data.**

| Material                                 | Electrolyte  | Specific Capacitance (F/g) | References |
|------------------------------------------|--------------|----------------------------|------------|
| Ti3C2Tx/PPy nanoparticles 2              | 1M Na2SO4    | 184                        | 7          |
| d-Ti3C2 (delaminated layers of Ti3C2)    | H2SO4        | 320                        | 8          |
| Orthorhombic niobium pentoxide (T-Nb2O5) | H2SO4        | 330                        | 9          |
| Ti3C2Tx/PPy                              | 1M H2SO4     | 416                        | 10         |
| Ti3C2Tx Aerogels                         | 3M H2SO4     | 438                        | 11         |
| Nb-doped MXene (Ti3C2)                   | 6M KOH       | 442                        | 12         |
| Ti3C2Tx/Ag2CrO4                          | 0.1M H2SO4   | 525                        | 13         |
| Ni-doped Nb2C MXene                      | 1M PVA-H2SO4 | 666                        | 14         |
| Sn@Mo2TiC2 MXene                         | 1M KOH       | 670                        | This work  |

the eq. (SI6) shows the relationship between real impedance  $Z_{real}$  and angular frequency ( $\omega$ ) in low frequency region [4-6].

$$Z_{\text{real}} = R_s + R_{\text{ct}} + \sigma \omega^{-0.5} \quad (\text{SI6})$$

Here  $\sigma$  belong to Warburg factor, which is calculated directly from the slop of the figure 7b. the coefficient of diffusion for  $\text{K}^+$  ions can be calculated through following eq.SI7

$$D = \frac{R^2 T^2}{2A^2 n^4 F^4 C^2 \sigma^2} \quad (\text{SI7})$$

Eq. SI7 clarifies the diffusion coefficient is directly proportional to R (gas constant) & T (absolute temperature) and inversely proportional to the A (surface area), n (no. of electrons), F (faraday constant), C (solution concentration) and D (diffusion coefficient).

## References

1. A. Zaheer, S. A. Zahra, M. Z. Iqbal, A. Mahmood, S. A. Khan, S. Rizwan, Nickel-adsorbed two-dimensional Nb<sub>2</sub>C MXene for enhanced energy storage applications, *RSC Adv.*, 2022, **12**, 4624.
2. S. A. Zahra, B. Anasori, M. Z. Iqbal, F. Ravoux, A. Tarawneh, Mohammednoor S. Rizwana, Enhanced electrochemical performance of vanadium carbide MXene composites for supercapacitors, *APL Materials*, 2022, **10**, 060901.
3. R. Li, X. Yu, X. Bian, F. Hu, Preparation, and electrochemical performance of VO<sub>2</sub> hollow spheres as a cathode for aqueous zinc ion batteries, *RSC Adv.*, 2019, **9**, 35117.
4. H. Liu, et al. Kinetic study on LiFePO<sub>4</sub>/C nanocomposites synthesized by solid state technique, *J. Power Sources*, 2006, **159**, 717–720.
5. A. J. Bard, L. R. Faulkner, *Electrochemical Methods*, 2<sup>edn</sup>, 2001, 211. (JOHN WILEY & SONS, INC. 2001)
6. S. Khamsanga1, R. Pornprasertsuk, T. Yonezawa, A. A. Mohamad, S. Kheawhom,  $\delta$ -MnO<sub>2</sub> nanoflower/graphite cathode for rechargeable aqueous zinc ion batteries, *Scientific Reports*, 2019, **9**, 8441.
7. A. Zaheer, S. A. Zahra, M. Z. Iqbal, A. Mahmood, S. A. Khan, S. Rizwan, Nickel-adsorbed two-dimensional Nb<sub>2</sub>C MXene for enhanced energy storage applications, *RSC Adv.*, 2022, **12**, 4624.

8. T. Yaqoob, M. Rani, A. Mahmood, R. Shafique, S. Khan, N. K. Janjua, A. A. Shah, A. Ahmad, A. Abdullah, Al-Kahtani, MXene/Ag<sub>2</sub>CrO<sub>4</sub> Nanocomposite as Supercapacitors Electrode, *Materials*, 2021, **14**, 6008.
9. X. Zang, J. Wang, Y. Qin, T. Wang, C. He, Q. Shao, H. Zhu, N. Cao, Enhancing capacitance performance of Ti<sub>3</sub>C<sub>2</sub>T<sub>x</sub> MXene as electrode materials of supercapacitor: From controlled preparation to composite structure construction, *Nano-Micro Lett.*, 2020, **12**, 77.
10. Y. Dall'Agnesse, M. R. Lukatskaya, K. M. Cook, P. L. Taberna, Y. Gogotsi and P. Simon, High capacitance of surface modified 2D titanium carbide in acidic electrolyte, *Electrochem. Commun.*, 2014, **48**, 118–122,
11. C. Zhang, et al., Synthesis and charge storage properties of hierarchical niobium pentoxide/carbon/niobium carbide (MXene) hybrid materials, *Chem. Mater.*, 2016, **28**(11), 3937–3943.
12. M. Boota, B. Anasori, C. Voigt, M. Q. Zhao, M. W. Barsoum, Y. Gogotsi, Pseudocapacitive electrodes produced by oxidant-free polymerization of pyrrole between the layers of 2D titanium carbide (MXene), *Adv. Mater.*, 2016, **28**, 1517–1522.
13. X. Wang, Q. Fu, J. Wen, X. Ma, C. Zhu, X. Zhang, D. Qi, 3D Ti<sub>3</sub>C<sub>2</sub>T<sub>x</sub>aerogels with enhanced surface area for high performance supercapacitors, *Nanoscale* 2018, **10**, 20828–20835.
14. M. Fatima, et al., Nb-doped MXene with enhanced energy storage capacity and stability, *front, Chem.*, 2020, **8**, 1–8.
